# Supplementary material for: Investigating the dynamics of excitons in monolayer WSe2 before and after organic super acid treatment
Source: Royal Society of Chemistry journal article supplement (doi:10.1039/c8nr00774h), 2018-01-01
Supplement: c8nr00774h1.pdf [file c8nr00774h1.pdf]

## Supporting Information

### Investigating dynamics of excitons in monolayer WSe<sub>2</sub> before and after organic super acid treatment

**Xin Chen<sup>#,a</sup> Zhuo Wang<sup>#,b,c,d</sup> Lei Wang<sup>\*,a,c</sup> Hai-Yu Wang<sup>\*,a</sup> Yuan-Yuan Yue<sup>,a</sup>  
Hai Wang<sup>,a</sup> Xue-Peng Wang<sup>,a</sup> Andrew T. S. Wee<sup>,d</sup> Cheng-Wei Qiu<sup>,c</sup> and Hong-  
Bo Sun<sup>a,e</sup>**

<sup>a</sup>State Key Laboratory of Integrated Optoelectronics, College of Electronic Science and Engineering, Jilin University, 2699 Qianjin Street, Changchun 130012, China.

<sup>b</sup>SZU-NUS Collaborative Innovation Center for Optoelectronic Science & Technology, College of Optoelectronic Engineering, Shenzhen University, Shenzhen 518060, China. <sup>c</sup>Department of Electrical & Computer Engineering, National University of Singapore, 4 Engineering Drive 3, Singapore 117583, Singapore.

<sup>d</sup>Department of Physics, National University of Singapore, 2 Science Drive 3, Singapore 117542, Singapore. <sup>e</sup>State Key Laboratory of Precision Measurement Technology and Instruments, Department of Precision Instrument, Tsinghua University, Haidian, Beijing 100084, China.

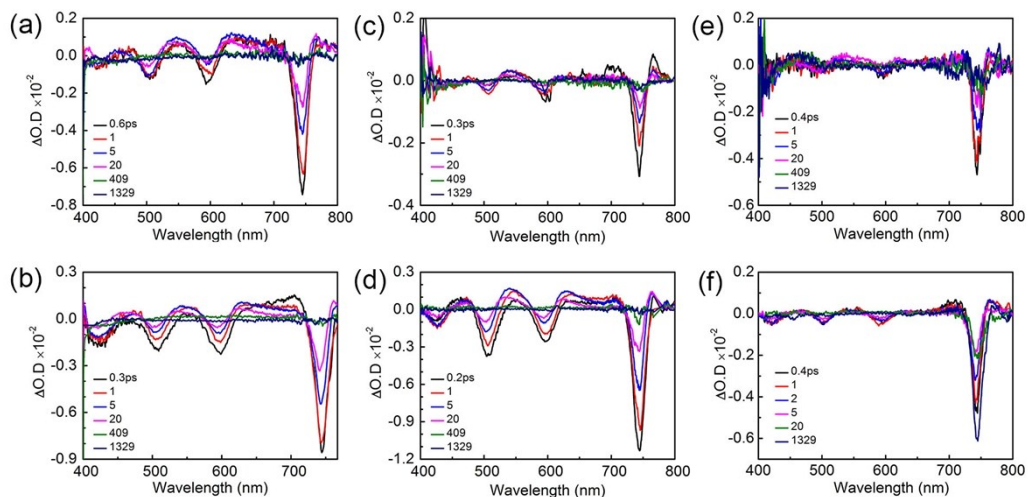

Figure S1. Measurements of organic super acid treated monolayer WSe<sub>2</sub> (osa-monolayer) by femtosecond pump-probe system. (a) Transient absorption (TA) spectrum of osa-monolayer WSe<sub>2</sub> excited under 400 nm pump pulse with pump fluence of 7.4  $\mu\text{J cm}^{-2}$ . (b) TA spectrum of osa-monolayer WSe<sub>2</sub> excited under 400 nm pump pulse with pump fluence of 76  $\mu\text{J cm}^{-2}$ . (c) TA spectrum of osa-monolayer WSe<sub>2</sub> excited under 610 nm pump pulse with pump fluence of 0.1  $\mu\text{J cm}^{-2}$ . (d) TA spectrum of osa-monolayer WSe<sub>2</sub> excited under 610 nm pump pulse with pump fluence of 0.52  $\mu\text{J cm}^{-2}$ . (e) TA spectrum of osa-monolayer WSe<sub>2</sub> excited under 730 nm pump pulse with pump fluence of 0.12  $\mu\text{J cm}^{-2}$ . (f) TA spectrum of osa-monolayer WSe<sub>2</sub> excited under 730 nm pump pulse with pump fluence of 0.14  $\mu\text{J cm}^{-2}$ .

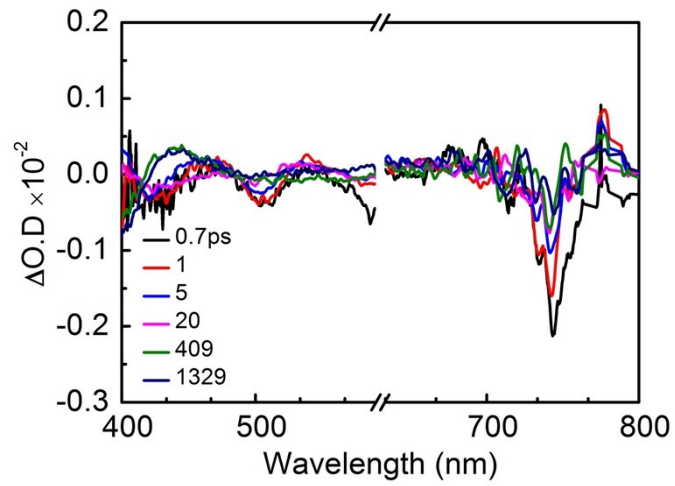

Figure S2. Measurements of monolayer WSe<sub>2</sub> without organic super acid treated by femtosecond pump-probe system. TA spectrum of monolayer WSe<sub>2</sub> excited under 610 nm pump pulse with pump fluence of 4.4  $\mu\text{J cm}^{-2}$ .

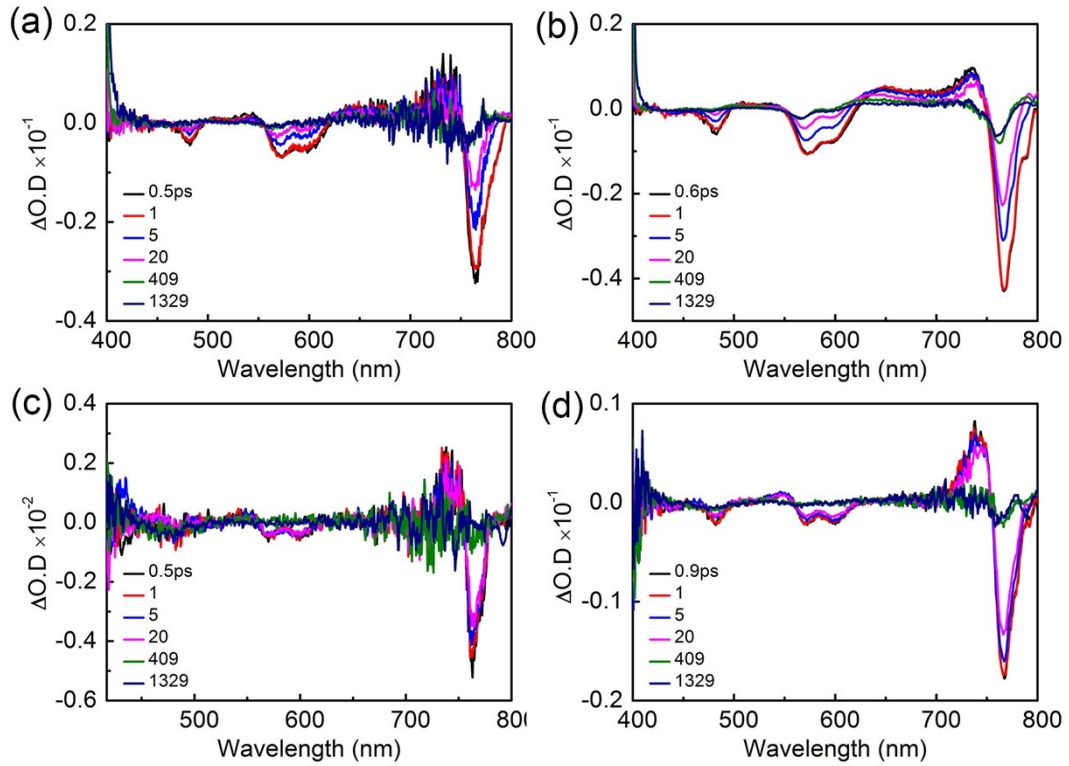

Figure S3. Measurements of bulk  $\text{WSe}_2$  by femtosecond pump-probe system. (a) TA spectrum of bulk  $\text{WSe}_2$  excited under 400 nm pump pulse with pump fluence of  $71 \mu\text{J cm}^{-2}$ . (b) TA spectrum of bulk  $\text{WSe}_2$  excited under 400 nm pump pulse with pump fluence of  $141 \mu\text{J cm}^{-2}$ . (c) TA spectrum of bulk  $\text{WSe}_2$  excited under 800 nm pump pulse with pump fluence of  $22 \mu\text{J cm}^{-2}$ . (d) TA spectrum of bulk  $\text{WSe}_2$  excited under 800 nm pump pulse with pump fluence of  $55 \mu\text{J cm}^{-2}$ .

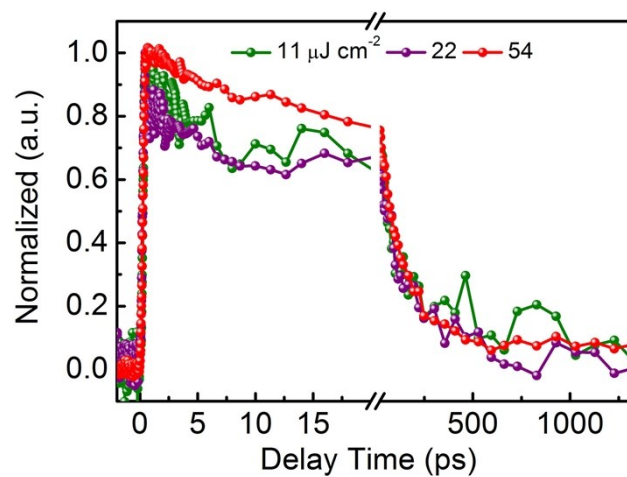

Figure S4. The normalized dynamics of A-exciton for bulk WSe<sub>2</sub> under 800 nm excitation with three pump fluences. Green line: pump fluence of 11  $\mu\text{J cm}^{-2}$ , purple line: pump fluence of 22  $\mu\text{J cm}^{-2}$ , red line: pump fluence of 54  $\mu\text{J cm}^{-2}$ .

Table S1. The enlargement factor of GSB signal of A exciton for monolayer WSe<sub>2</sub> after organic super acid treatment under different pump fluences.

| 610 nm excitation                                     | osa-monolayer WSe <sub>2</sub> |      |      |      |      | Untreated monolayer WSe <sub>2</sub> |
|-------------------------------------------------------|--------------------------------|------|------|------|------|--------------------------------------|
| Pump fluence<br>( $\mu\text{J cm}^{-2}$ )             | 0.1                            | 0.33 | 0.52 | 1.1  | 2    | 4.4                                  |
| $\Delta\text{O.D. intensity}$<br>( $\times 10^{-2}$ ) | 0.23                           | 0.84 | 1.04 | 0.51 | 0.68 | 0.21                                 |
| Enlargement factor                                    | 48                             | 53   | 42   | 9.7  | 7.1  | ---                                  |
